# Supplementary material for: Adjudin protects rodent cochlear hair cells against gentamicin ototoxicity via the SIRT3-ROS pathway
Source: PubMed Central journal article supplement — Sci Rep. 2015 Feb 2;5:8181. doi: 10.1038/srep08181 (PMC4313083; doi:10.1038/srep08181), 2015-02-02
Supplement: srep08181-s1.pdf [file srep08181-s1.pdf]

# **Adjudin protects rodent cochlear hair cells against gentamicin ototoxicity via SIRT3-ROS pathway**

Yizhou Quan<sup>a,b#</sup>, Li Xia<sup>c#</sup>, Jiaxiang Shao<sup>a,b</sup>, Shankai Yin<sup>c</sup>, C. Yan Cheng<sup>d</sup>, Weiliang Xia<sup>a,b\*</sup>, Wei-Qiang Gao<sup>a,b\*</sup>

<sup>a</sup>State Key Laboratory of Oncogenes and Related Genes, Renji-MedX Stem Cell Research Center, Ren Ji Hospital, School of Medicine, Shanghai Jiao Tong University, Shanghai, China

<sup>b</sup>School of Biomedical Engineering & Med-X Research Institute, Shanghai Jiao Tong University, Shanghai, China

<sup>c</sup>Department of Otolaryngology, Affiliated Sixth People's Hospital of Shanghai Jiao Tong University, Otolaryngology Institute of Shanghai Jiao Tong University, Shanghai, China

<sup>d</sup>The Mary M. Wohlford Laboratory for Male Contraceptive Research, Center for Biomedical Research, Population Council, New York, New York, USA

<sup>#</sup>The authors contributed equally to this work

<sup>\*</sup>Corresponding authors:

**Weiliang Xia, Ph.D.**, Room 211, Med-X Research Institute, Shanghai Jiao Tong University, 1954 Huashan Road, Shanghai 200030, China. Tel: +86-21-62933291; Fax: +86-21-62932302; Email: wxia@sjtu.edu.cn

**Or Wei-Qiang Gao, Ph.D.**, Stem Cell Research Center, RenJiHospital, Shanghai Jiao Tong University School of Medicine, 1630 Dongfang Road, Shanghai 200127, China. Tel: +86-21-62932049; Email: weiqgao@yahoo.com

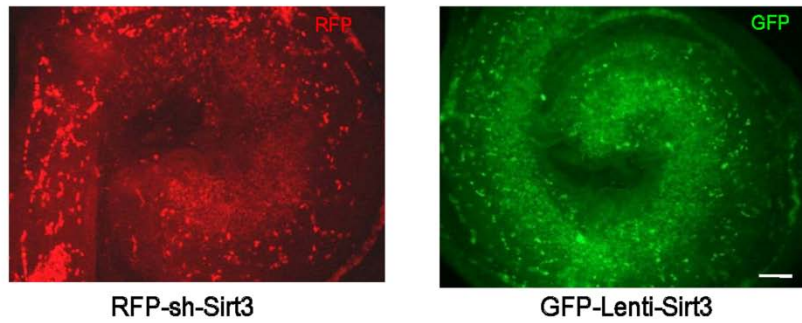

Fig.S1 Whole mount cochlear tissues infected with GFP or RFP -lenti-virus. Bar = 100  $\mu$ m.

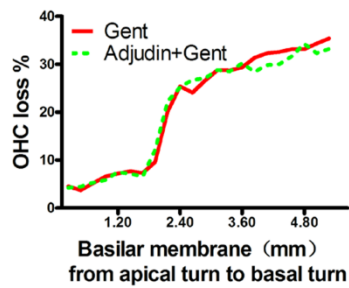

Fig.S2 Quantification of outer hair cell loss in the group that received gentamicin (40 mg/kg) or adjudin (75 mg/kg) before gentamicin (40 mg/kg) application and was observed 7 days post the injection.  $p > 0.05$ , two-way ANOVA of the parameters between various regimens, followed by post-hoc tests.
